1 **Test-retest reliability and concurrent validity of the**  
2 **Adapted Short QUestionnaire to ASsess Health-enhancing**  
3 **physical activity (Adapted-SQUASH) in adults with**  
4 **disabilities.**

5 Bregje L. Seves<sup>1\*</sup>, Femke Hoekstra<sup>1,2,3</sup>, Jorrit W.A. Schoenmakers<sup>4</sup>, Pim Brandenbarg<sup>1,2</sup>,  
6 Trynke Hoekstra<sup>2,5</sup>, Florentina J. Hettinga<sup>6</sup>, Rienk Dekker<sup>2</sup>, Lucas H.V. van der Woude<sup>1,2,8</sup>,  
7 Cees P. van der Schans<sup>2,7</sup>

8 <sup>1</sup> University of Groningen, University Medical Center Groningen, Center for Human Movement Sciences,  
9 Groningen, The Netherlands.

10 <sup>2</sup> University of Groningen, University Medical Center Groningen, Department of Rehabilitation Medicine,  
11 Groningen, The Netherlands.

12 <sup>3</sup> University of British Columbia Okanagan, School of Health and Exercise Sciences, Kelowna, British  
13 Columbia, Canada.

14 <sup>4</sup> University of Groningen, University Medical Center Groningen, Department of Orthopedics, Groningen, The  
15 Netherlands.

16 <sup>5</sup> Vrije Universiteit Amsterdam, Department of Health Sciences and Amsterdam Public Health research institute,  
17 Amsterdam, The Netherlands.

18 <sup>6</sup> Northumbria University, Department of Sport, Exercise and Rehabilitation, Newcastle, United Kingdom.

19 <sup>7</sup> Hanze University of Applied Sciences, Research and Innovation Group in Health Care and Nursing,  
20 Groningen, The Netherlands.

21 <sup>8</sup> Peter Harrison Centre for Disability Sport, School of Sport, Exercise & Health Sciences,  
22 Loughborough University, UK.

23

24 \* Corresponding author

25 E-mail: [B.l.seves@umcg.nl](mailto:B.l.seves@umcg.nl)

26 Word count: 5948

NOTE: This preprint reports new research that has not been certified by peer review and should not be used to guide clinical practice.

## 27 **Abstract**

28 The current study determined the test-retest reliability and concurrent validity of the Adapted  
29 Short QUestionnaire to ASsess Health-enhancing physical activity (Adapted-SQUASH) in  
30 adults with disabilities. Before filling in the Adapted-SQUASH twice with a recall period of  
31 two weeks, participants wore the Actiheart activity monitor up to one week. For the test-retest  
32 reliability (N=68), Intraclass correlation coefficients (ICCs) were 0.67 ( $p < 0.001$ ) for the total  
33 activity score (min x intensity/week) and 0.76 ( $p < 0.001$ ) for the total minutes of activity  
34 (min/week). For the concurrent validity (N=58), the Spearman correlation coefficient was 0.40  
35 ( $p = 0.002$ ) between the total activity score of the first administration of the Adapted-SQUASH  
36 and activity energy expenditure from the Actiheart ( $\text{kcal} \cdot \text{kg}^{-1} \cdot \text{min}^{-1}$ ). The ICC was 0.22  
37 ( $p = 0.027$ ) between the total minutes of activity assessed with the first administration of the  
38 Adapted-SQUASH and Actiheart. The Adapted-SQUASH is an acceptable measure to assess  
39 self-reported physical activity in large populations of adults with disabilities, but is not  
40 applicable at the individual level due to wide limits of agreement. Self-reported physical activity  
41 assessed with the Adapted-SQUASH does not accurately represent physical activity assessed  
42 with the Actiheart in adults with disabilities, as indicated with a systematic bias between both  
43 instruments in the Bland-Altman analysis.

44

## 45 **Key words**

46 Physical activity assessment, accelerometer, chronic disease, rehabilitation, health promotion

47

## 48 **Introduction**

49 Measuring patients' physical activity behaviour is important for evaluating effectivity of  
50 physical activity promotion interventions and, ideally, individually tailoring rehabilitation

## Reliability and validity of the Adapted-SQUASH

51 programmes among adults suffering from a physical disability and/or chronic disease that  
52 impairs mobility (further: adults with disabilities) [1]. Therefore, an accurate and efficient  
53 measurement instrument for assessing (self-reported) physical activity in people with physical  
54 disabilities is essential. Although accelerometer-derived physical activity might be preferred,  
55 mostly it is not practically feasible, and it is too expensive among large scale populations in  
56 interventions and/or cohort studies. Self-reports are frequently used measurement tools to  
57 assess physical activity in disabled populations, both in rehabilitation practice and in research  
58 [2,3]. Also, questionnaires are easy to fill in [4-6]. However, self-reported physical activity  
59 depends on the persons' recall and mostly is not sensitive for light physical activities at home  
60 (e.g. walking from the bedroom to the toilet and from the kitchen to the dining table) or outside  
61 (e.g. walking to the mailbox to post a letter) [7].

62 A self-reported physical activity measure was needed in the multicentre longitudinal  
63 cohort study Rehabilitation, Sports and Active lifestyle (ReSpAct) to evaluate physical activity  
64 during and after the physical activity stimulation programme Rehabilitation, Sports and  
65 Exercise (RSE; Dutch: 'Revalidatie, Sport en Bewegen') [8,9]. The RSE programme was  
66 successfully implemented in eighteen rehabilitation institutions in the Netherlands [10]. The  
67 questionnaire was required to be suitable for the target population: people with a physical  
68 disability and/or chronic disease. There are few physical activity questionnaires available  
69 specifically developed for adults with disabilities [3]. The Physical Activity Scale for  
70 Individuals with Physical Disabilities (PASIPD) [11] was considered for the ReSpAct study,  
71 since it is commonly used amongst the target population. To precisely assess the physical  
72 activity behaviour before and after a physical activity promotion intervention [6], and to clarify  
73 the dose-response relationship between physical activity and the received counselling during  
74 the intervention [12], frequency, intensity, duration and type of the activity should be measured.  
75 The PASIPD assesses duration and type of physical activities but does not specifically assess

## Reliability and validity of the Adapted-SQUASH

76 the frequency and intensity of physical activities, whereby it was considered not applicable for  
77 the ReSpAct cohort. The Short Questionnaire to Assess Health-enhancing physical activity  
78 (SQUASH) developed for healthy adults does measure frequency, intensity, duration and type  
79 of physical activities [4]. The SQUASH is widely used, for example by governmental agencies  
80 to monitor large scale physical activity behaviour among the Dutch population and to monitor  
81 whether physical activity guidelines are achieved. Studies on the psychometric properties of the  
82 SQUASH have supported the appropriateness of the SQUASH to measure the level of weekly  
83 physical activity in a healthy adult population [4], in patients after a total hip arthroplasty [13]  
84 and in outpatients with ankylosing spondylitis [14].

85 When assessing physical activity in adults with disabilities, it needs to be taken into  
86 account that this target population may have a different perceived intensity of activities  
87 compared to a healthy population [15]. It is expected that adults with a disability experience  
88 activities as more intense, because activities often cost (absolutely and relatively) more energy  
89 compared to healthy adults [16,17]. Therefore, the ReSpAct research team converted the  
90 original SQUASH into a measurement tool (mentioned from here: the Adapted-SQUASH) that  
91 was expected to better meet the perceived intensity of activities among people with disabilities  
92 compared with the original SQUASH, by using appropriate metabolic equivalent of task (MET)  
93 values for this target population. Also, the SQUASH was adapted to better match the activity  
94 pattern of wheelchair users by including common physical activity behaviours: wheelchair  
95 sports (e.g. wheelchair basketball) and questions concerning wheelchair propulsion and  
96 handcycling [9]. The SQUASH has two main outcome measures: the activity score, measuring  
97 a combination of intensity and duration of physical activity per week, and total minutes of  
98 activity per week (duration).

99 It is relevant for (rehabilitation) practice and research in (adapted) physical activity to  
100 determine the psychometric properties of the Adapted-SQUASH among a sample of adults with

## Reliability and validity of the Adapted-SQUASH

101 disabilities. Apart from test-retest reliability, construct validity is deemed an important asset.  
102 The Actiheart (Cambridge Neurotechnology™ UK), an uniaxial activity monitor, was  
103 identified by the research team as a suitable criterion measure to compare with the outcomes of  
104 the Adapted-SQUASH. Since the Actiheart is a medical device, it is suitable for ambulant  
105 people with disabilities. The Actiheart is accurate in measuring physical activity energy  
106 expenditure (AEE) in free living conditions, and ideally it combines its measured heart rate and  
107 movement sensor information improving the prediction of AEE in daily physical activities  
108 [5,18].

109 The current study aims to determine the test-retest reliability and concurrent validity of  
110 the Adapted-SQUASH among adults with disabilities. We focused on the two main outcome  
111 measures of the Adapted-SQUASH, the total activity score and the total minutes of activity per  
112 week [4], which were derived from the test and retest of the Adapted-SQUASH as well as from  
113 the Actiheart activity monitor among a convenience sample of adults with disabilities.

114

## 115 **Methods**

### 116 **Study population**

117 Participants were recruited through patient activity groups in hospitals, rehabilitation centres,  
118 sport clubs and patient associations in the northern and eastern provinces in the Netherlands.  
119 Inclusion criteria were being at least eighteen years of age, having a physical disability and/or  
120 chronic disease (e.g. stroke, heart failure, Parkinson's disease) and being able to read and write  
121 the Dutch language. Participants were excluded when they were still receiving inpatient or  
122 outpatient rehabilitation care, were participating in the ReSpAct study [8,9], were completely  
123 wheelchair dependent (because of the use of the Actiheart), or were not able to complete the  
124 questionnaires even with help. The data collection took place from November 2014 till June  
125 2016.

## 126 **Study procedures**

127 This study consisted of a test-retest reliability study and a validity study. For the test-retest  
128 reliability study, the participants filled out the first Adapted-SQUASH twice, with  
129 approximately two weeks between the measurement occasions.

130 For the validity study, the participant was asked to wear an Actiheart activity monitor  
131 (Cambridge Neurotechnology™ UK) to objectively measure physical activity levels during the  
132 week prior to administration of the first Adapted-SQUASH. Two researchers visited the  
133 participants in their free-living home situation twice, to install and attach the Actiheart to the  
134 participants' chest, and to collect the Actiheart after one week. The Actiheart measurement  
135 started at 00:00 AM and continued for the next seven consecutive days, both day and night. The  
136 participant was instructed to remove the Actiheart during showering, bathing, or swimming. In  
137 addition, the participant filled out a diary in which noncompliance to the Actiheart was noted.  
138 Measurements were included in the validity study when a minimum registration of the Actiheart  
139 of at least four days valid acceleration data (at least 75% activity data registration of 24 hours)  
140 for each participant was present [19].

141 Participants' general characteristics were obtained by using a questionnaire. Participant's  
142 body weight (kg) and height (m) were measured by researchers by using a personal scale and  
143 measuring tape, respectively. The study was approved by the Ethics Committee of the Center  
144 of Human Movement Sciences (ECB/2014.06.30\_1) at the University of Groningen, University  
145 Medical Center Groningen. All participants voluntarily signed an informed consent.

146

## 147 **The Adapted Short Questionnaire to ASsess Health-enhancing physical** 148 **activity (Adapted-SQUASH)**

149 The 19-item Adapted-SQUASH (see supplemental file) is a self-reported recall questionnaire  
150 to assess physical activity among adults with disabilities based on an average week in the past

## Reliability and validity of the Adapted-SQUASH

151 month as reference period. Equal to the original SQUASH [4], the Adapted-SQUASH is pre-  
152 structured in four main domains outlining types and settings of activity: ‘commuting traffic’,  
153 ‘activities at work and school’, ‘household activities’ and ‘leisure time activities’ including  
154 ‘sports activities’. The frequency in days per week, the duration in average hours and minutes  
155 per day and the perceived intensity were asked.

156 Several adjustments have been made to make the original SQUASH applicable for  
157 people with disabilities, as described in the study protocol of the ReSpAct study [9]. First, the  
158 items ‘wheelchair riding’ and ‘handcycling’ were added in the domains ‘commuting activities  
159 and leisure-time’ and ‘sports activities’. Second, the self-reported intensity of the activity was  
160 categorised into ‘light’, ‘moderate’ and ‘vigorous’, instead of ‘slow’, ‘moderate’ and ‘fast’.  
161 Third, the syntax to determine the outcome measures of the Adapted-SQUASH includes a large  
162 range of Adapted sports (e.g. wheelchair basketball/rugby/tennis) for the item ‘sports  
163 activities’. The MET-values in the syntax were updated based on the most recent version of the  
164 Ainsworth’ compendium of physical activities [20] and MET-values for wheelchair riding,  
165 handcycling and adapted sports were added based on a compendium of energy costs of physical  
166 activities for wheelchair dependent individuals [21]. Lastly, in the examples of different sports  
167 ‘tennis’ was replaced by ‘(wheelchair) tennis’.

168

### 169 **The total activity score per week (Adapted-SQUASH)**

170 For practical use of the questionnaire all outcome measures of the Adapted-SQUASH were  
171 calculated by using a syntax. The total activity score and the total minutes of activity per week  
172 are the main outcomes of the Adapted-SQUASH. The total activity score (min x intensity/week)  
173 was calculated following the procedure described by Wendel-Vos et al. (2003). First, all the  
174 questions in the Adapted-SQUASH were assigned to a MET-value representing the intensity of  
175 this task, based on the Ainsworth’ compendium of physical activities [20] and based on a

## Reliability and validity of the Adapted-SQUASH

176 compendium of energy costs of physical activities for wheelchair dependent individuals [21].  
177 Second, an activity score was calculated for each domain by multiplying the total minutes of  
178 activity with a self-reported intensity score, which is based on age and MET-values [4]. Lastly,  
179 the total activity score was calculated by summing up the activity scores of the four domains.  
180 In accordance with the original SQUASH, data were excluded if the total minutes of activity a  
181 day exceeded 960 minutes or if values were missing [4].

182

### 183 **The total minutes of activity per week (Adapted-SQUASH)**

184 The total minutes of activity per week (min/week) assessed with the Adapted-SQUASH were  
185 calculated by summing up the total minutes of physical activity per week reported in the  
186 Adapted-SQUASH. Also, the total minutes of light, moderate and vigorous intensity activities  
187 per week (min/week) were calculated, using MET-value cut-off points based on the Dutch  
188 physical activity guidelines [22].

189

### 190 **The Actiheart activity monitor**

191 The Actiheart (Cambridge Neurotechnology™ UK) activity monitor is a combined uniaxial  
192 accelerometer and heart rate monitor, which was used to measure accelerometer-derived  
193 physical activity. The Actiheart is a reliable and valid measurement method, and was deemed  
194 appropriate for our target population, because the combination of accelerometer data with heart  
195 rate data would be better able to determine the intensity of physical activities [23]. The Actiheart  
196 was attached to the participation's chest by using two Electrocardiography (ECG) electrodes.  
197 The Actiheart is a lightweight (8gram) and compact (7x33mm) device, connected to the two  
198 ECG electrode and capable of storing time-sequenced data. Acceleration (1D, vertical axis) was  
199 measured with a 15-second epoch by a piezoelectric element within the unit with a frequency



200 range of 1-7Hz. The Actiheart output provides activity counts and heart rate data per minute,  
201 simultaneously.

202

### 203 **Activity energy expenditure (Actiheart)**

204 Based on the Actiheart data, AEE estimates in  $\text{kcal kg}^{-1} \text{ min}^{-1}$  were calculated for each minute  
205 by combining activity counts and heart rate in a branched equations model as described in  
206 literature [23,24] and as proposed by the Actiheart software for AEE (see supplemental file). A  
207 branched equation model allows the Actiheart to accurately assess AEE even when there is low  
208 body movement, but high heart rate during an activity. The combined activity and heart rate  
209 algorithm to calculate AEE needs the individual's sleeping heart rate. The sleeping heart rate  
210 was calculated by averaging the minute-to-minute heart rate between 2.00-5.00am on the first  
211 day the Actiheart was worn.

212 When heart rate was missing, AEE was calculated based on the activity algorithm only  
213 for the specific missing minute. The total AEE per week was calculated by summing up the  
214 AEE minute-to-minute data, divided by the number of valid days the Actiheart was worn and  
215 multiplied by seven (assuming that the average amount of physical activity a day is  
216 representative for all weekdays and weekend days).

217 In addition, MET values were calculated for each minute based on the AEE minute-to-  
218 minute data, following the Ainsworth' compendium of physical activities [20]. In the next step,  
219 MET values per minute were categorised in the following MET categories: sedentary behaviour  
220 (1.0-1.5 METs), light intensity (1.6-2.9 METs), moderate intensity (3.0-5.9 METs) and  
221 vigorous intensity ( $\geq 6$  METs). Sum scores of all minutes in each MET category were calculated.  
222 Also, a sum score for all minutes of physical activity was calculated ( $\geq 1.6$  METs). Sum scores  
223 were divided by the number of valid days the Actiheart was worn and multiplied by seven for  
224 week scores.

## 225 **Statistical analysis**

226 Descriptive statistics were used to describe the demographic characteristics of the study  
227 population. Test-retest reliability of the Adapted-SQUASH was determined by calculating  
228 Intraclass correlation coefficients (ICCs) (two-way random, absolute agreement, single  
229 measures) for the total activity score (total, four main domains separately and all individual  
230 item separately), as well for the total minutes of activity (total and separately per intensity  
231 category) between the first and second measurement occasion. The ICC quantifies the degree  
232 to which the two measurements are absolutely related [25]. Since there is no widely accepted  
233 criterion for defining the strength of a correlation, we used a general guideline for clinical  
234 research: a correlation below 0.25 indicates little or no agreement, a correlation between 0.25  
235 and 0.50 indicates fair agreement, a correlation between 0.50 and 0.75 indicates moderate to  
236 good agreement and a correlation higher than 0.75 indicates good to excellent agreement [26].  
237 Also, confidence intervals were calculated for the ICCs. Additionally, Bland-Altman analyses  
238 were performed to illustrate the agreement between the first and second measurement of the  
239 Adapted-SQUASH [27,28]. Subsequently, a one-sample t-test was performed to determine any  
240 systematic bias.

241 Concurrent validity of the Adapted-SQUASH was determined by calculating a  
242 Spearman correlation coefficient between the total activity score (min x intensity/week) based  
243 on the baseline administration of the Adapted-SQUASH and the total AEE (kcal<sup>s</sup> kg<sup>-1</sup>/week)  
244 based on the Actiheart data. Non-parametric Spearman correlation coefficients were chosen  
245 because assumptions of normality were not met for the outcomes of the Adapted-SQUASH and  
246 the two continuous outcome variables do not have the same measurement unit. In addition,  
247 concurrent validity of the Adapted-SQUASH was determined by calculating an ICC between  
248 the total minutes of activity (min/week) based on the baseline administration of the Adapted-  
249 SQUASH and the total minutes of activity (min/week) based on the Actiheart data, and by

## Reliability and validity of the Adapted-SQUASH

250 performing a Bland-Altman analysis. Although ICCs are preferred if the two measurement  
251 instruments are expressed in the same units (min/week) [29], a Spearman correlation coefficient  
252 was also calculated between the total minutes of activity assessed with the Adapted-SQUASH  
253 and Actiheart to compare our correlation with previous literature [4,11,13,14]. There is no  
254 consensus on how high correlations should be in order to demonstrate acceptable validity of a  
255 physical activity questionnaire [30]. The same interpretation of correlations as mentioned above  
256 is used for the validity of the Adapted-SQUASH. The level of significance was set at 0.05. Data  
257 were analysed using the Statistical Package for the Social Science (IBM SPSS Statistics, version  
258 24).

259

## 260 **Results**

261 A convenience sample of adults with disabilities (N=80) was approached. Finally, 68  
262 participants were included in the test-retest reliability study and 58 in the validity study. Twelve  
263 out of 80 participants were excluded from the test-retest reliability study because they did not  
264 fill out the second questionnaire due to illness (N=1), surgery (N=1) or unknown reasons  
265 (N=10). Based on the characteristics, the included and excluded sample only statistically  
266 significantly differed in average body weight (see supplemental file). Body weight was on  
267 average  $89.8 \pm 3.2$  kg in the excluded sample and  $79.1 \pm 14.7$  kg in the included sample. Based  
268 on the criterion of a minimum of four days valid Actiheart accelerometer data, 22 out of 80  
269 participants were excluded from the validity study. We included participants with four days  
270 (N=5), five days (N=1), six days (N=6), and seven days (N=46) of valid Actiheart accelerometer  
271 data, whereof all participants had at least three weekdays and one weekend day available. Based  
272 on the characteristics, the included and excluded sample only significantly differed in the use  
273 of mobility aid (see supplemental file). In the excluded sample, more people used a mobility  
274 aid (32%) compared to the included sample (17%).

## Reliability and validity of the Adapted-SQUASH

275 The characteristics of the participants for the test-retest reliability (N=68) and the  
276 validity (N=58) studies are presented in Table 1. The Adapted-SQUASH was completed for a  
277 second time after a mean period of  $17\pm 4$  days.

278

279 [Please insert table 1 here]

280

### 281 **Test-retest reliability**

282 The ICC for the repeated Adapted-SQUASH measurements was 0.67 ( $p<0.001$ ) for the total  
283 activity score, and 0.76 ( $p<0.001$ ) for the total minutes of activity per week, which respectively  
284 indicated a moderate to good and good to excellent agreement [25] (Table 2). Test-retest  
285 reliability within the light, moderate and vigorous intensity categories were respectively 0.89  
286 ( $p<0.001$ ), 0.64 ( $p<0.001$ ), and 0.32 ( $p=0.004$ ). ICCs for the separate activity categories were:  
287 0.39 ( $p<0.001$ ) for commuting activities, 0.77 ( $p<0.001$ ) for activities at work, 0.41 ( $p<0.001$ )  
288 for household activities, and 0.44 ( $p<0.001$ ) for leisure-time activities. Test-retest reliability of  
289 the separate items of the questionnaire ranged from 0.00 for intense activities at work to 0.81  
290 for walking during commuting (Table 2). Test-retest reliability of the new added items for  
291 handcycling activities during commuting and leisure time and wheelchair riding during  
292 commuting could not be determined because too few participants reported this activity. Test-  
293 retest reliability for wheelchair riding in leisure time was 0.27 ( $p=0.011$ ).

294

295 [Please insert table 2 here]

296

297 Bland-Altman analyses showed that the mean difference between the first and second  
298 measurement was not significantly different from zero for both the total activity score ( $t_{67}=-$   
299 0.03,  $p=0.98$ ) and for the total minutes of activity ( $t_{67}=0.11$ ,  $p=0.92$ ), indicating no systematic

## Reliability and validity of the Adapted-SQUASH

300 bias between the two measurements. We found wide Limits of Agreement (LOA) with 95% of  
301 the measurements of the total activity score within the boundaries of 4072 activity score above  
302 and below the mean difference (Fig 1), and with 95% of the measurements of the total minutes  
303 of activity within the boundaries of 945 minutes activity above and below the mean difference  
304 (Fig 2). Besides, based on the Bland-Altman plots the absolute amount of time spent on physical  
305 activity and the total activity score were higher at the second measurement occasion than at the  
306 first measurement occasion, while the total activity score was lower at the second measurement  
307 than at the first measurement occasion.

308

309 [Please insert figure 1 here]

310

311 [Please insert figure 2 here]

312

### 313 **Concurrent validity**

314 Correlation coefficients for the concurrent validity are presented in Table 3. A significant  
315 Spearman correlation coefficient was found between the total activity score from the Adapted-  
316 SQUASH and the AEE from the Actiheart ( $\rho=0.40$ ,  $p=0.002$ ). A significant ICC of 0.22 was  
317 found between the total minutes of activity per week from the Adapted-SQUASH and the total  
318 minutes of activity per week from the Actiheart ( $p=0.027$ ). The correlation coefficients  
319 indicated fair and little agreement, respectively. No significant ICCs were found between the  
320 total minutes of light and moderate activity per week calculated with the Adapted-SQUASH  
321 and Actiheart. Only a significant ICC of 0.21 ( $p=0.046$ ) was found between the total minutes  
322 of vigorous activity per week from the Adapted-SQUASH and Actiheart, indicating little  
323 agreement between the two measurement tools.

324 Bland-Altman analysis showed that the mean difference between the total minutes of  
325 activity calculated with the Adapted-SQUASH and Actiheart was significantly different from  
326 zero ( $t_{57}=3.48$ ,  $p=0.001$ ), indicating systematic bias between the two. We found wide LOA with  
327 95% of the measurements of the total minutes of activity within the boundaries of 1485 minutes  
328 above and below the mean difference (Fig 3). Besides, based on the Bland-Altman plot the  
329 absolute amount of time spent on physical activity was higher reported in the Adapted-  
330 SQUASH questionnaire compared to physical activity assessed with the Actiheart.

331

332 [Please insert table 3 here]

333

## 334 Discussion

335 The current study showed good reproducibility of the Adapted SQUASH to assess self-reported  
336 physical activity in populations of people with disabilities, but not at the individual level since  
337 the Bland-Altman analyses found wide LOA. In addition, the current study showed fairly  
338 acceptable validity of the Adapted SQUASH, but the Bland-Altman analysis showed wide  
339 LOA, which indicates that self-reported physical activity individually assessed with the  
340 Adapted-SQUASH does not accurately represent individually accelerometer-derived physical  
341 activity assessed with the Actiheart in people with disabilities.

342

### 343 Test-retest reliability

344 The test-retest reliability of the total activity score per week ( $ICC=0.67$ ,  $p<.001$ ) of the Adapted-  
345 SQUASH is slightly higher compared to the Spearman correlation coefficients found in studies  
346 of the original SQUASH among 50 healthy adults ( $\rho=0.58$ ) [4], among 44 patients after a total  
347 hip arthroplasty ( $\rho=0.57$ ) [13], but slightly lower compared to a study among 52 patients with

## Reliability and validity of the Adapted-SQUASH

348 ankylosing spondylitis ( $\rho=0.89$ ) [14]. Also, our result of the test-retest reliability of the total  
349 minutes per week ( $ICC=0.76$ ,  $p<.001$ ) of the Adapted-SQUASH is comparable to the Spearman  
350 correlation coefficient for the test-retest reliability of the PASIPD in similar populations with  
351 a disability ( $\rho=0.77$ ) [11]. A special note when comparing the test-retest reliability of our study  
352 to others is that we examined the test-retest reliability by using ICCs, while others used  
353 Spearman correlation coefficients [4,13,14]. ICCs give lower correlation coefficients compared  
354 to Spearman correlation coefficients, because an ICC is the absolute agreement between the  
355 first and second measurement, which does not correct for systematic differences. In accordance  
356 with previous studies [13,14], the Bland-Altman analysis showed no systematic bias on total  
357 activity scores between test and retest. Although the Adapted-SQUASH has good test-retest  
358 reliability and the mean differences between the first and second measurement are close to zero,  
359 relatively wide LOA are found for the total activity score and the total minutes of activity,  
360 which indicated that the degree of repeatability is insufficient at the individual level and/or that  
361 levels of physical activity fluctuate over time. Therefore, the Adapted-SQUASH can be used to  
362 assess self-reported physical activity behaviour in large (patient) populations, but is not  
363 acceptable to monitor individual physical activity levels. Also, it indicates that large changes in  
364 the outcomes of the Adapted-SQUASH should be found when interested in the course of self-  
365 reported physical activity over time (e.g. before and after an intervention or treatment).

366 The Adapted-SQUASH also calculated the total minutes of light, moderate and vigorous  
367 activity per week. In previous literature, Wendel-Vos et al. (2003) and Wagenmakers et al.  
368 (2008) found the highest Spearman correlation coefficient for the total minutes of vigorous  
369 activity per week, respectively 0.92[4] and 0.85[13], while we found the lowest correlation for  
370 the total minutes of vigorous activity per week ( $ICC=0.32$ ,  $p=.004$ ). Explanation of this  
371 outcome is that vigorous intensity activities, such as weekly scheduled sports activities, are the  
372 easiest to recall for healthy adults [31], while intermittent light intensity activities (e.g. walking)

## Reliability and validity of the Adapted-SQUASH

373 are more difficult to recall [32,33]. However, adults with disabilities might experience activities  
374 as more intense, since activities often cost more energy compared to healthy adults [16,17] and  
375 may be more variable over the day due to fatigue and lack of appropriate pacing behaviour [34-  
376 37]. Therefore, temporal fluctuation in light intensity activities in healthy adults, may be similar  
377 to temporal fluctuation in moderate or vigorous intensity activities in our target population.  
378 Furthermore, our sample reported less minutes of vigorous intensity activities (so a lower  
379 between subjects' variance) compared to light intensity activities, which might give a lower  
380 ICC.

381 The Adapted-SQUASH provides information of different settings of physical activity  
382 (commuting activities, activities at work/school, household activities and leisure time activities  
383 including different sports). We found low test-retest reliability for leisure-time activities, which  
384 might be explained by the non-regular frequency of this type of activities per week, due to  
385 barriers to physical activity such as the amount of leisure-time, tiredness, or bad weather  
386 conditions [38]. The quite low correlation for intense activities at work could be due to a small  
387 percentage of the population who can perform intense activities at work and the high variability  
388 in vigorous activities. The two newly added items 'wheelchair riding' and 'handcycling' in the  
389 Adapted-SQUASH had low response, because our study excluded people who were completely  
390 wheelchair dependent. However, our study population did mention adapted sports in the  
391 category 'sports activities' (e.g. wheelchair basketball).

392 Another interesting variable is the sport outcome measure indicating good test-retest  
393 reliability (ICC=0.76,  $p < 0.001$ ), probably because sports activities are often easy to recall, and  
394 sports participation is a stable behaviour with scheduled regular practice. This variable is often  
395 used in clinical settings, as well as in policy making and governmental guidelines worldwide.  
396 Insight in sports activities can be used for a tailored advice regarding an active lifestyle during  
397 or after rehabilitation, which has health-influencing effects, is crucial for quality of life,



398 mobility and participation in everyday life and is strongly recommended for adults with  
399 disabilities [39].

400

### 401 **Concurrent validity**

402 The concurrent validity of the total activity score per week of the Adapted-SQUASH ( $\rho=0.40$ ,  
403  $p=.002$ ), when compared with the total AEE per week assessed with the Actiheart, is lower  
404 compared to the Spearman correlation coefficients found in studies of the original SQUASH  
405 among 50 healthy adults ( $\rho=0.45$ , physical activity was assessed with the computer science and  
406 applications activity monitor) [4], among 44 patients after a total hip arthroplasty ( $\rho=0.67$ ,  
407 physical activity was assessed with an Actigraph accelerometer) [13], but higher compared to  
408 a study among 52 patients with ankylosing spondylitis ( $\rho=0.35$ , physical activity was assessed  
409 with an Actigraph accelerometer) [14]. Also, the concurrent validity of the total minutes of  
410 activity per week of the Adapted-SQUASH ( $ICC=0.22$ ,  $p=.027$  and  $\rho=0.36$ ,  $p=.006$ ), when  
411 compared with the total minutes of activity assessed with the Actiheart, is lower compared to  
412 the Spearman correlation coefficient found in the study of the original SQUASH among 50  
413 healthy adults ( $\rho=0.56$ ) [4], but higher compared to the Spearman correlation coefficient for the  
414 validity of the PASIPD among people with disabilities ( $\rho=0.30$ , physical activity was assessed  
415 with an Actigraph accelerometer) [11]. The lower concurrent validity of physical activity  
416 questionnaires in people with disabilities compared to healthy adults might be due to variation  
417 of the questionnaire and variation of the standard. Also, cognitive function, which is sometimes  
418 affected in people with disabilities, might influence the recall of activities and thereby might  
419 explain the differences between self-reported and accelerometer-derived physical activity [32].

420 In addition, although the Bland-Altman analysis showed no systematic bias between the  
421 total minutes of activity per week assessed with the Adapted-SQUASH and Actiheart, the LOA  
422 were wide. This indicated that the Adapted-SQUASH does not accurately represent

## Reliability and validity of the Adapted-SQUASH

423 accelerometer-derived physical activity assessed with the Actiheart in individuals with  
424 disabilities. Previous literature also found that individual self-reported physical activity  
425 compared to physical activity assessed with an accelerometer was not accurate in people after  
426 joint arthroplasty [40] and in people with spinal cord injury [7]. Besides, the mean difference  
427 between the Adapted-SQUASH and Actiheart was 346 minutes per week, which indicates that  
428 people with disabilities seem to overestimate their self-reported physical activity assessed with  
429 the Adapted-SQUASH compared to accelerometer-derived physical activity assessed with the  
430 Actiheart. This is in agreement with previous literature [41-43]. This overestimation of actual  
431 time spent being physically active is probably attributable to recall bias, such as the difficulty  
432 in recalling short breaks during physical activity (e.g. socializing or refreshment during the  
433 reported time doing sports, or taking rest during the reported time doing gardening or household  
434 activities) [7], while the Actiheart does measure all sorts of short breaks during physical activity  
435 and over the day. Another potential bias between self-reported and accelerometer-derived  
436 physical activity outcomes may reside in the appreciation and perception of physical activities  
437 and their intensities, which notions may be quite different in our population in the context of  
438 their often low physical work capacity [44] and phenomena of fatigue during the day [35,36].  
439 This introduces a difference in what one does and what one perceives.

440         Consequently, for the total minutes of vigorous activities per week low or little  
441 agreement was found between the Adapted-SQUASH and Actiheart (ICC=0.21, p=.046), while  
442 no agreement was found for the total minutes of light (ICC=0.05, p=.346) and moderate  
443 (ICC=0.03, p=.401) activities per week. This suggests that the perceived intensity of activities  
444 in people with disabilities is not in agreement with the accelerometer-derived intensities of  
445 activities assessed with the Actiheart. Therefore, we suggest to use the total minutes of physical  
446 activity per week assessed with the Adapted-SQUASH when interested in dose-response

447 relationships among for instance physical activity and health outcomes, or between physical  
448 activity and the received intervention/treatment in people with disabilities.

449

## 450 **Limitations**

451 A few limitations need to be considered. First, the Adapted-SQUASH used MET values from  
452 the Ainsworth compendium of physical activities, which were derived from and intended for  
453 use in able-bodied adults [20]. This limitation could have overestimated the total activity score  
454 for each intensity category [20,45], because our target population probably experiences  
455 activities as more intense compared to healthy adults [16,17], as well as less consistent during  
456 the day. Also, the Adapted-SQUASH is sensitive to overestimation of frequency and/or  
457 duration of the activities, due to recall bias. A more or less similar limitation is however true  
458 for the Actiheart device, where the used sensor algorithms are not specific to people with  
459 disabilities, but have been derived from the general healthy population [23,24]. This stresses  
460 the need for more population-specific validation studies also of objective physical activity  
461 measurement tools in the future [46].

462 Thirdly, the test-retest period was on average seventeen days. This duration could be  
463 too short to prevent participants from copying the Adapted-SQUASH from memory. However,  
464 following the recommendations of Matthews et al. (2012), we have consciously chosen for this  
465 short recall period to decrease the reporting error of activities, since physical activity levels tend  
466 to fluctuate between days and weeks due to weather conditions [47] and/or due to fluctuating  
467 experienced health or fatigue conditions among this population of persons with a disability [37].  
468 Furthermore, we did not check at the participant if the week the Actiheart was worn was a  
469 representative week of their physical activity behaviour.

470 Lastly, the Actiheart is a device capable of measuring heart rate and acceleration, and  
471 combines these variables in a branched equation model to calculate AEE [23,24]. However, we

## Reliability and validity of the Adapted-SQUASH

472 found a large amount of missing heart rate data in our sample, while calculating AEE based on  
473 the heart rate and combined algorithm is preferred [24]. The median percentage of missing heart  
474 rate was 22% (inter quartile range: 10% - 42%). The unsuccessful measurement of heart rate  
475 may have happened due to malfunction of the battery or the electrodes. However, if during the  
476 week participants felt that the electrodes loosened or if the electrodes had not been replaced by  
477 the fourth day, the instruction was given to replace the electrodes. As stated above another  
478 limitation is that the algorithm from the Actiheart to calculate AEE has not been validated  
479 among adults with deviating movement patterns and adults using drugs against high blood  
480 pressure, who are included in our target population. This is however the case for most of the  
481 activity monitor devices currently available [48].

482

### 483 **Practical implications and further research**

484 The Adapted-SQUASH provides information on various dimensions (frequency, duration and  
485 intensity) and settings (e.g. household, leisure time), is inexpensive, and has low burden for  
486 participants to fill in. Together this turns the Adapted-SQUASH into a useful tool to assess self-  
487 reported physical activity among adults with disabilities in large population studies. Firstly, the  
488 Adapted-SQUASH can be used in community and health-care settings, like rehabilitation  
489 centres, to monitor physical activity levels in large heterogeneous populations with disabilities.  
490 For this practical use, the Adapted-SQUASH is distinctive compared with other physical  
491 activity questionnaires (e.g. PASIPD), because even though the questionnaire specifically  
492 assesses type, frequency and intensity of activities, it is short and quick to fill in and it includes  
493 physical activities for wheelchair users and adapted sports. Secondly, the Adapted-SQUASH  
494 can be used for large longitudinal cohort studies or intervention studies to evaluate self-reported  
495 physical activity. For example, the Adapted-SQUASH has already been used in the longitudinal  
496 cohort study ReSpAct, which aimed to evaluate physical activity in people with disabilities

## Reliability and validity of the Adapted-SQUASH

497 during and after a physical activity stimulation programme [8,9]. When accurate and complete  
498 measures of physical activity are preferred in further research among large populations with  
499 disabilities, we suggest using both the Adapted-SQUASH (in the total sample) and an activity  
500 monitor (in a sub-sample). The Adapted-SQUASH provides information on the setting of the  
501 activity, while an activity monitor provides information on intermittent activities (e.g. walking  
502 at home and taking rest during activities) [7,33]. So, selection of the best measurement to assess  
503 physical activity depends on the purpose, construct, measurement unit, population, setting etc.  
504 [6].

505 For practical implications, we recommend using the total minutes of activity per week  
506 or the total activity score, which were the two main outcome measures of the Adapted-  
507 SQUASH, to assess self-reported physical activity in people with disabilities. The test-retest  
508 reliability of the total minutes of activity per week was good but systematic bias with the  
509 Actiheart was found. The test-retest reliability of the total activity score per week was lower  
510 and the perceived intensity of activities (light, moderate and vigorous) was not in agreement  
511 with the Actiheart. However, outcomes should be interpreted with caution since our sample of  
512 people with disabilities overestimated their physical activity. Also, for future research it is  
513 recommended to assess the validity and test-retest reliability of the Adapted-SQUASH among  
514 people who are completely wheelchair dependent.

515

## 516 **Conclusion**

517 The Adapted-SQUASH is an acceptable measure to assess self-reported physical activity in  
518 large populations of people with disabilities but is not applicable at the individual level due to  
519 the wide LOA. Self-reported physical activity assessed with the Adapted-SQUASH does not  
520 accurately represent accelerometer-derived physical activity assessed with the Actiheart in  
521 individuals with disabilities. They seem to overestimate their physical activity and find it

## Reliability and validity of the Adapted-SQUASH

522 difficult to recall the perceived intensity of the activity. The test-retest reliability and concurrent  
523 validity of the Adapted-SQUASH are comparable to other physical activity questionnaires  
524 among people with disabilities. We recommend using the total minutes of activity per week  
525 and/or total activity score, derived from the Adapted-SQUASH, to evaluate physical activity in  
526 large populations of people with disabilities in rehabilitation practice and (cohort) research.

527

## 528 **Acknowledgements**

529 The authors wish to thank the participating subjects and the students in the bachelor and master  
530 Human Movement Sciences at the University of Groningen who contributed to the data  
531 collection. The authors would like to thank Leonie A. Krops for her critical reading and  
532 comments on a draft of the manuscript.

533

## 534 **Declaration of interest**

535 The authors declare that they have no conflicts of interest or financial disclosures. This study is  
536 funded by Stichting Beatrixoord Noord-Nederland and a personal grant received from the  
537 University of Groningen, University Medical Center Groningen (grant date 1-9-2018).

538

## 539 **References**

- 540 1. van der Ploeg HP, van der Beek AJ, van der Woude LH, van Mechelen W. Physical activity  
541 for people with a disability: a conceptual model. *Sports Med* 2004;34(10):639-649.
- 542 2. Booth M. Assessment of physical activity: an international perspective. *Res Q Exerc Sport*  
543 2000 Jun;71(2 Suppl):S114-20.
- 544 3. Cervantes CM, Porretta DL. Physical activity measurement among individuals with  
545 disabilities: a literature review. *Adapt Phys Activ Q* 2010 Jul;27(3):173-190.

## Reliability and validity of the Adapted-SQUASH

- 546 4. Wendel-Vos GC, Schuit AJ, Saris WH, Kromhout D. Reproducibility and relative validity  
547 of the short questionnaire to assess health-enhancing physical activity. *J Clin Epidemiol* 2003  
548 Dec;56(12):1163-1169.
- 549 5. Rennie KL, Wareham NJ. The validation of physical activity instruments for measuring  
550 energy expenditure: problems and pitfalls. *Public Health Nutr* 1998 Dec;1(4):265-271.
- 551 6. Nigg CR, Fuchs R, Gerber M, Jekauc D, Koch T, Krell-Roesch J, et al. Assessing physical  
552 activity through questionnaires - A consensus of best practices and future directions.  
553 *Psychology of Sport & Exercise* 2020.
- 554 7. Ma JK, McCracken LA, Voss C, Chan FHN, West CR, Martin Ginis KA. Physical activity  
555 measurement in people with spinal cord injury: comparison of accelerometry and self-report  
556 (the Physical Activity Recall Assessment for People with Spinal Cord Injury). *Disabil Rehabil*  
557 2020 Jan;42(2):240-246.
- 558 8. Hoekstra F, Alingh RA, van der Schans CP, Hettinga FJ, Duijf M, Dekker R, et al. Design  
559 of a process evaluation of the implementation of a physical activity and sports stimulation  
560 programme in Dutch rehabilitation setting: ReSpAct. *Implement Sci* 2014 Sep 20;9:127-014-  
561 0127-7.
- 562 9. Alingh RA, Hoekstra F, van der Schans CP, Hettinga FJ, Dekker R, van der Woude LH.  
563 Protocol of a longitudinal cohort study on physical activity behaviour in physically disabled  
564 patients participating in a rehabilitation counselling programme: ReSpAct. *BMJ Open* 2015 Jan  
565 29;5(1):e007591-2015-007591.
- 566 10. Hoekstra F, Hoekstra T, van der Schans CP, Hettinga FJ, van der Woude LHV, Dekker R,  
567 et al. The implementation of a physical activity counseling program in rehabilitation care:  
568 findings from the ReSpAct study. *Disabil Rehabil* 2019 Oct 17:1-12.
- 569 11. van der Ploeg HP, Streppel KR, van der Beek AJ, van der Woude LH, Vollenbroek-Hutten  
570 M, van Mechelen W. The Physical Activity Scale for Individuals with Physical Disabilities:

## Reliability and validity of the Adapted-SQUASH

- 571 test-retest reliability and comparison with an accelerometer. *J Phys Act Health* 2007  
572 Jan;4(1):96-100.
- 573 12. Prince SA, Adamo KB, Hamel ME, Hardt J, Connor Gorber S, Tremblay M. A comparison  
574 of direct versus self-report measures for assessing physical activity in adults: a systematic  
575 review. *Int J Behav Nutr Phys Act* 2008 Nov 6;5:56-5868-5-56.
- 576 13. Wagenmakers R, van den Akker-Scheek I, Groothoff JW, Zijlstra W, Bulstra SK, Kootstra  
577 JW, et al. Reliability and validity of the short questionnaire to assess health-enhancing physical  
578 activity (SQUASH) in patients after total hip arthroplasty. *BMC Musculoskelet Disord* 2008  
579 Oct 17;9:141-2474-9-141.
- 580 14. Arends S, Hofman M, Kamsma YP, van der Veer E, Houtman PM, Kallenberg CG, et al.  
581 Daily physical activity in ankylosing spondylitis: validity and reliability of the IPAQ and  
582 SQUASH and the relation with clinical assessments. *Arthritis Res Ther* 2013 Aug  
583 23;15(4):R99.
- 584 15. Dawes HN, Barker KL, Cockburn J, Roach N, Scott O, Wade D. Borg's rating of perceived  
585 exertion scales: do the verbal anchors mean the same for different clinical groups? *Arch Phys*  
586 *Med Rehabil* 2005 May;86(5):912-916.
- 587 16. Waters RL, Mulroy S. The energy expenditure of normal and pathologic gait. *Gait Posture*  
588 1999 Jul;9(3):207-231.
- 589 17. Wezenberg D, van der Woude LH, Faber WX, de Haan A, Houdijk H. Relation between  
590 aerobic capacity and walking ability in older adults with a lower-limb amputation. *Arch Phys*  
591 *Med Rehabil* 2013 Sep;94(9):1714-1720.
- 592 18. Strath SJ, Bassett DR, Jr, Swartz AM, Thompson DL. Simultaneous heart rate-motion sensor  
593 technique to estimate energy expenditure. *Med Sci Sports Exerc* 2001 Dec;33(12):2118-2123.



## Reliability and validity of the Adapted-SQUASH

- 594 19. Klaren RE, Hubbard EA, Zhu W, Motl RW. Reliability of Accelerometer Scores for  
595 Measuring Sedentary and Physical Activity Behaviors in Persons With Multiple Sclerosis.  
596 *Adapt Phys Activ Q* 2016 Apr;33(2):195-204.
- 597 20. Ainsworth BE, Haskell WL, Herrmann SD, Meckes N, Bassett DR,Jr, Tudor-Locke C, et  
598 al. 2011 Compendium of Physical Activities: a second update of codes and MET values. *Med*  
599 *Sci Sports Exerc* 2011 Aug;43(8):1575-1581.
- 600 21. Conger SA, Bassett DR. A compendium of energy costs of physical activities for individuals  
601 who use manual wheelchairs. *Adapt Phys Activ Q* 2011 Oct;28(4):310-325.
- 602 22. Hildebrandt V, Ooijendijk W, Stiggelhout M. Trendrapport bewegen en gezondheid  
603 1998/1999. 1999;p. 23-9.
- 604 23. Brage S, Brage N, Franks PW, Ekelund U, Wareham NJ. Reliability and validity of the  
605 combined heart rate and movement sensor Actiheart. *Eur J Clin Nutr* 2005 Apr;59(4):561-570.
- 606 24. Crouter SE, Churilla JR, Bassett DR,Jr. Accuracy of the Actiheart for the assessment of  
607 energy expenditure in adults. *Eur J Clin Nutr* 2008 Jun;62(6):704-711.
- 608 25. Cicchetti DV. Guidelines, criteria, and rules of thumb for evaluating normed and  
609 standardized assessment instruments in psychology. *Psychological Assessment* 1994;6(4):284-  
610 290.
- 611 26. Portney LG, Watkins MP. *Foundations of Clinical Research: Applications to Practice*. :  
612 Upper Saddle River, NJ: Pearson/Prentice Hall; 2009.
- 613 27. Bland JM, Altman DG. Measuring agreement in method comparison studies. *Stat Methods*  
614 *Med Res* 1999 Jun;8(2):135-160.
- 615 28. Giavarina D. Understanding Bland Altman analysis. *Biochem Med (Zagreb)* 2015 Jun  
616 5;25(2):141-151.
- 617 29. Vet HCWd, Terwee CB, Mokkink LB, Knol DL. *Measurement in medicine : a practical*  
618 *guide*. Cambridge: Cambridge University Press; 2011.

## Reliability and validity of the Adapted-SQUASH

- 619 30. Terwee CB, Mokkink LB, van Poppel MN, Chinapaw MJ, van Mechelen W, de Vet HC.  
620 Qualitative attributes and measurement properties of physical activity questionnaires: a  
621 checklist. *Sports Med* 2010 Jul 1;40(7):525-537.
- 622 31. Jacobs DR,Jr, Ainsworth BE, Hartman TJ, Leon AS. A simultaneous evaluation of 10  
623 commonly used physical activity questionnaires. *Med Sci Sports Exerc* 1993 Jan;25(1):81-91.
- 624 32. Herbolzheimer F, Riepe MW, Peter R. Cognitive function and the agreement between self-  
625 reported and accelerometer-accessed physical activity. *BMC Geriatr* 2018 Feb 21;18(1):56-  
626 018-0747-x.
- 627 33. Skender S, Ose J, Chang-Claude J, Paskow M, BrÃ¼hmann B, Siegel EM, et al.  
628 Accelerometry and physical activity questionnaires - a systematic review. *BMC Public Health*  
629 2016 Jun 16;16:515-016-3172-0.
- 630 34. Murphy SL, Kratz AL. Activity pacing in daily life: A within-day analysis. *Pain* 2014  
631 Dec;155(12):2630-2637.
- 632 35. Rimmer JH, Chen MD, Hsieh K. A conceptual model for identifying, preventing, and  
633 managing secondary conditions in people with disabilities. *Phys Ther* 2011 Dec;91(12):1728-  
634 1739.
- 635 36. Martin Ginis KA, Ma JK, Latimer-Cheung AE, Rimmer JH. A systematic review of review  
636 articles addressing factors related to physical activity participation among children and adults  
637 with physical disabilities. *Health Psychol Rev* 2016 Dec;10(4):478-494.
- 638 37. Abonie US, Edwards AM, Hettinga FJ. Optimising activity pacing to promote a physically  
639 active lifestyle in medical settings: A narrative review informed by clinical and sports pacing  
640 research. *J Sports Sci* 2020 Mar;38(5):590-596.
- 641 38. King AC. Intervention strategies and determinants of physical activity and exercise behavior  
642 in adult and older adult men and women. *World Rev Nutr Diet* 1997;82:148-158.

## Reliability and validity of the Adapted-SQUASH

- 643 39. Haskell WL, Lee IM, Pate RR, Powell KE, Blair SN, Franklin BA, et al. Physical activity  
644 and public health: updated recommendation for adults from the American College of Sports  
645 Medicine and the American Heart Association. *Circulation* 2007 Aug 28;116(9):1081-1093.
- 646 40. Vaughn NH, Dunklebarger MF, Mason MW. Individual Patient-reported Activity Levels  
647 Before and After Joint Arthroplasty Are Neither Accurate nor Reproducible. *Clin Orthop Relat*  
648 *Res* 2019 Mar;477(3):536-544.
- 649 41. Feuering R, Vered E, Kushnir T, Jette AM, Melzer I. Differences between self-reported and  
650 observed physical functioning in independent older adults. *Disabil Rehabil* 2014;36(17):1395-  
651 1401.
- 652 42. Chinapaw MJ, Sloopmaker SM, Schuit AJ, van Zuidam M, van Mechelen W. Reliability  
653 and validity of the Activity Questionnaire for Adults and Adolescents (AQuAA). *BMC Med*  
654 *Res Methodol* 2009 Aug 10;9:58-2288-9-58.
- 655 43. Sebastiao E, Gobbi S, Chodzko-Zajko W, Schwingel A, Papini CB, Nakamura PM, et al.  
656 The International Physical Activity Questionnaire-long form overestimates self-reported  
657 physical activity of Brazilian adults. *Public Health* 2012 Nov;126(11):967-975.
- 658 44. Carroll DD, Courtney-Long EA, Stevens AC, Sloan ML, Lullo C, Visser SN, et al. Vital  
659 signs: disability and physical activity--United States, 2009-2012. *MMWR Morb Mortal Wkly*  
660 *Rep* 2014 May 9;63(18):407-413.
- 661 45. Rikli RE. Reliability, validity, and methodological issues in assessing physical activity in  
662 older adults. *Res Q Exerc Sport* 2000 Jun;71(2 Suppl):S89-96.
- 663 46. Lankhorst K, Oerbekke M, van den Berg-Emons R, Takken T, de Groot J. Instruments  
664 Measuring Physical Activity in Individuals Who Use a Wheelchair: A Systematic Review of  
665 Measurement Properties. *Arch Phys Med Rehabil* 2020 Mar;101(3):535-552.

## Reliability and validity of the Adapted-SQUASH

- 666 47. Matthews CE, Moore SC, George SM, Sampson J, Bowles HR. Improving self-reports of  
667 active and sedentary behaviors in large epidemiologic studies. *Exerc Sport Sci Rev* 2012  
668 Jul;40(3):118-126.
- 669 48. Van Remoortel H, Giavedoni S, Raste Y, Burtin C, Louvaris Z, Gimeno-Santos E, et al.  
670 Validity of activity monitors in health and chronic disease: a systematic review. *Int J Behav*  
671 *Nutr Phys Act* 2012 Jul 9;9:84-5868-9-84.
- 672

673 **Tables**

674 **Table 1 Characteristics of the participants for the test-retest reliability study (N=68) and the validity study**  
675 **(N=58)**

|                                      | <b>Test-retest reliability<br/>study (N=68)</b> | <b>Validity study<br/>(N=58)</b> |
|--------------------------------------|-------------------------------------------------|----------------------------------|
|                                      | Mean±SD or N(%)                                 | Mean±SD or N(%)                  |
| Gender (% male)                      | 31 (46)                                         | 27 (47)                          |
| Age (years)                          | 56.9 ± 17.6                                     | 54.7 ± 18.7                      |
| Body height (m)                      | 1.73 ± 0.10                                     | 1.74 ± 0.09                      |
| Body weight (kg)                     | 79.1 ± 14.7                                     | 80.8 ± 14.3                      |
| Body Mass Index (kg/m <sup>2</sup> ) | 26.6 ± 4.7                                      | 26.7 ± 4.5                       |
| Drug use (% yes)                     | 60 (88)                                         | 48 (83)                          |
| Use of mobility aid (% yes)          | 17 (25)                                         | 10 (17)                          |
| Diagnosis                            |                                                 |                                  |
| Musculoskeletal disease              | 2 (3)                                           | 2 (3)                            |
| Brain disorder                       | 22 (32)                                         | 15 (26)                          |
| Neurologic disease                   | 5 (7)                                           | 5 (9)                            |
| Organ disease                        | 31 (46)                                         | 29 (50)                          |
| Other diseases <sup>a</sup>          | 6 (9)                                           | 7 (12)                           |

SD=standard deviation, N=number of participants

<sup>a</sup> E.g. Ménière's disease, Hereditary Motor and Sensory Neuropathy type II, worn neck vertebrae, low-back pain.

676

Reliability and validity of the Adapted-SQUASH

677 **Table 2 Intraclass correlation coefficients (ICC) between the first and second measurement of the Adapted-**  
678 **SQUASH (N=68)**

|                                         | Physical activity levels   |                             | Test-retest reliability |          |       |
|-----------------------------------------|----------------------------|-----------------------------|-------------------------|----------|-------|
|                                         | First test<br>Median (IQR) | Second test<br>Median (IQR) | ICC                     | 95%CI    | p     |
| <b>Main outcomes</b>                    |                            |                             |                         |          |       |
| Total activity score <sup>a</sup>       | 1706 (658 – 4151)          | 1950 (900 – 3864)           | .67                     | .51-.78  | <.001 |
| Total minutes of activity/week          | 379 (189 – 861)            | 473 (246 – 939)             | .76                     | .64-.85  | <.001 |
| <b>Intensity categories (min/week)</b>  |                            |                             |                         |          |       |
| Light                                   | 86 (30 – 233)              | 90 (30 – 278)               | .89                     | .83-.93  | <.001 |
| Moderate                                | 68 (3 – 308)               | 119 (30 – 366)              | .64                     | .48-.76  | <.001 |
| Vigorous                                | 53 (30 – 131)              | 78 (30 – 135)               | .32                     | .09-.51  | .004  |
| <b>Item activity scores<sup>a</sup></b> |                            |                             |                         |          |       |
| Commuting                               | 0 (0 – 10)                 | 0 (0 – 15)                  | .39                     | .17-.57  | <.001 |
| Walking                                 | 0 (0 – 0)                  | 0 (0 – 0)                   | .81                     | .72-.88  | <.001 |
| Bicycling                               | 0 (0 – 8)                  | 0 (0 – 0)                   | .29                     | .06-.50  | .007  |
| Handcycling                             | 0 (0 – 0)                  | 0 (0 – 0)                   |                         | NA       |       |
| Wheelchair riding                       | 0 (0 – 0)                  | 0 (0 – 0)                   |                         | NA       |       |
| Activities at work                      | 0 (0 – 705)                | 0 (0 – 525)                 | .77                     | .65-.85  | <.001 |
| Light                                   | 0 (0 – 705)                | 0 (0 – 450)                 | .78                     | .67-.86  | <.001 |
| Vigorous                                | 0 (0 – 0)                  | 0 (0 – 0)                   | .00                     | -.24-.24 | .499  |
| Household activities                    | 53 (21 – 116)              | 54 (16 – 112)               | .41                     | .20-.59  | <.001 |
| Light                                   | 45 (16 – 60)               | 33 (15 – 75)                | .43                     | .21-.61  | <.001 |
| Vigorous                                | 0 (0 – 15)                 | 0 (0 – 30)                  | .20                     | -.03-.42 | .044  |
| Leisure time                            | 136 (73 – 238)             | 178 (91 – 244)              | .44                     | .23-.61  | <.001 |
| Walking                                 | 19 (0 – 45)                | 21 (8 – 45)                 | .21                     | -.03-.42 | .046  |
| Bicycling                               | 15 (0 – 30)                | 24 (0 – 38)                 | .15                     | -.09-.38 | .110  |
| Handcycling                             | 0 (0 – 0)                  | 0 (0 – 0)                   |                         | NA       |       |
| Wheelchair riding                       | 0 (0 – 0)                  | 0 (0 – 0)                   | .27                     | .04-.48  | .011  |
| Gardening                               | 0 (0 – 28)                 | 0 (0 – 30)                  | .19                     | -.05-.41 | .059  |
| Odd jobs                                | 0 (0 – 6)                  | 0 (0 – 26)                  | .50                     | .30-.66  | <.001 |
| Sports                                  | 45 (0 – 105)               | 45 (23 – 105)               | .76                     | .64-.85  | <.001 |

IQR=Inter Quartile Range, ICC=Intraclass Correlation Coefficient, CI=Confidence Interval, NA=not applicable due to too low response on this item.

<sup>a</sup> Activity score = minutes x intensity

Reliability and validity of the Adapted-SQUASH

680 **Table 3 Correlation coefficients between the first measurement of the Adapted-SQUASH and the Actiheart**  
681 (N=58)

| Outcomes Adapted-SQUASH                 | Physical activity levels   |                                        | Concurrent validity   |          |      |
|-----------------------------------------|----------------------------|----------------------------------------|-----------------------|----------|------|
|                                         | First test<br>Median (IQR) | Actiheart <sup>b</sup><br>Median (IQR) | $r_{\text{spearman}}$ | p        |      |
| Total activity score <sup>a</sup>       | 1903 (958 – 4260)          | 49 (26 – 74)                           | .40                   |          | .002 |
| Total minutes of activity/week          | 454 (231 – 1073)           | 341 (106 – 727)                        | .36                   |          | .006 |
|                                         |                            |                                        | ICC                   | 95%CI    | p    |
| Total minutes of activity/week          | 454 (231 – 1073)           | 341 (106 – 727)                        | .22                   | -.01-.44 | .027 |
| Total minutes of light activity/week    | 83 (43 – 369)              | 223 (91 - 548)                         | .05                   | -.21-.31 | .346 |
| Total minutes of moderate activity/week | 101 (0 – 371)              | 31 (10 – 114)                          | .03                   | -.17-.24 | .401 |
| Total minutes of vigorous activity/week | 60 (30 – 136)              | 27 (10 – 92)                           | .21                   | -.03-.43 | .046 |

IQR=Inter Quartile Range, ICC=Intraclass Correlation Coefficient, CI=Confidence Interval; p<0.05: significantly different from zero.

<sup>a</sup> Activity score = minutes x intensity

<sup>b</sup> Values are in total minutes per week, only the total activity score of the Adapted-SQUASH is compared with activity energy expenditure in kcal $\text{kg}^{-1}\text{min}^{-1}$ .

682

683 Figures

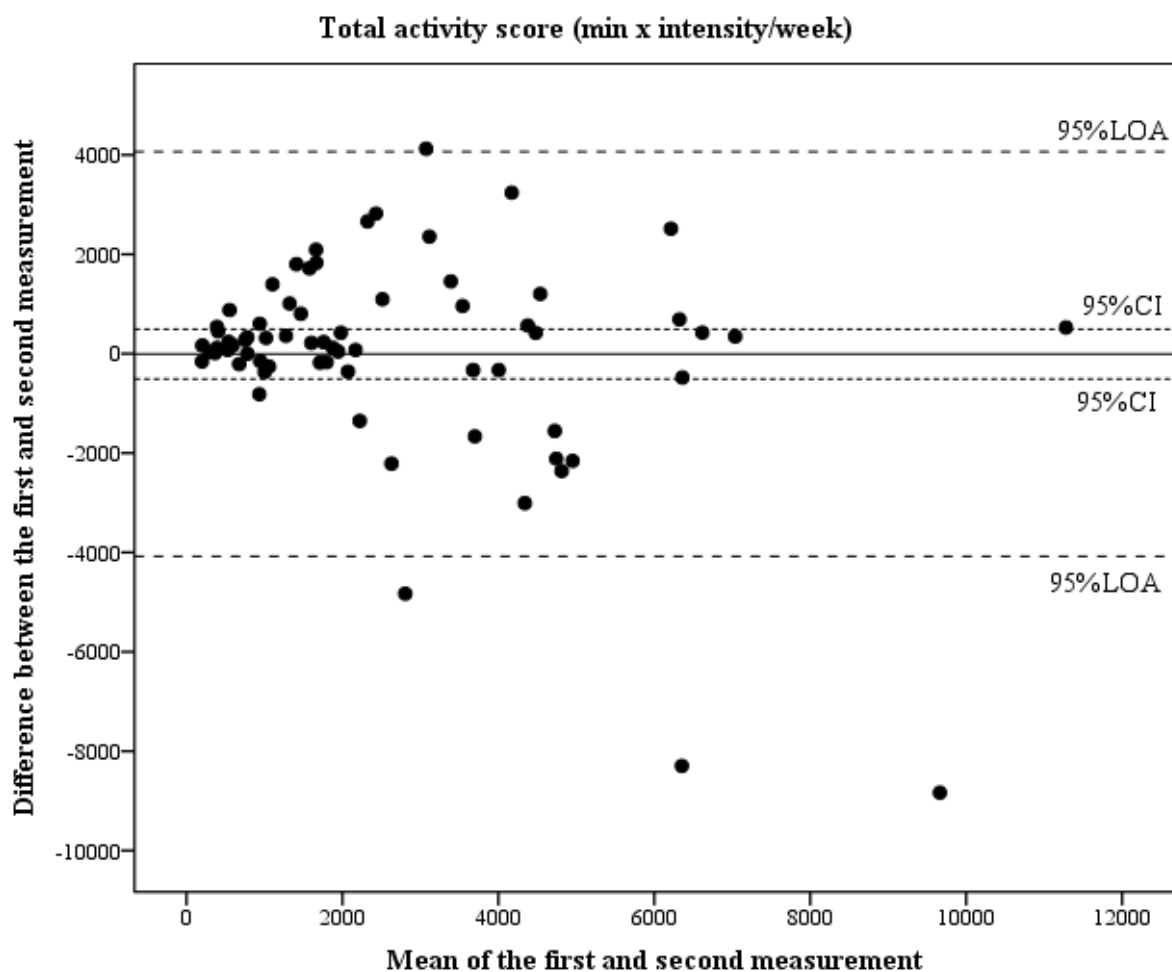

684  
685 **Fig 1. The differences between the total activity scores on the first and second measurement of the Adapted-**  
686 **SQUASH, plotted against their mean for each participant, together with the 95% confidence interval (CI)**  
687 **and the 95% Limits of Agreement (LOA) (N=68).**



## Reliability and validity of the Adapted-SQUASH

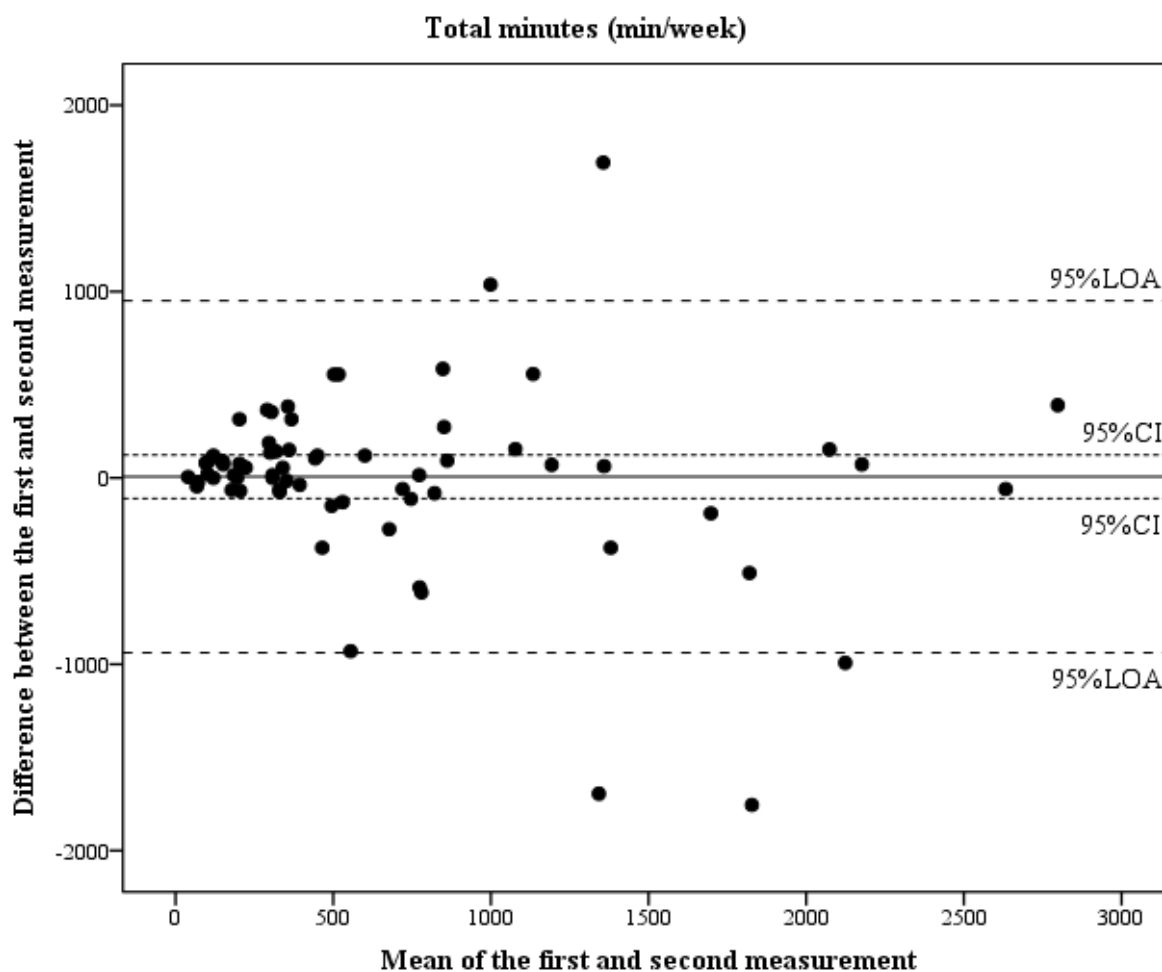

688

689 Fig 2. The differences between the total minutes of activity on the first and second measurement of the  
690 Adapted-SQUASH, plotted against their mean for each participant, together with the 95% confidence  
691 interval (CI) and the 95% Limits of Agreement (LOA) (N=68).

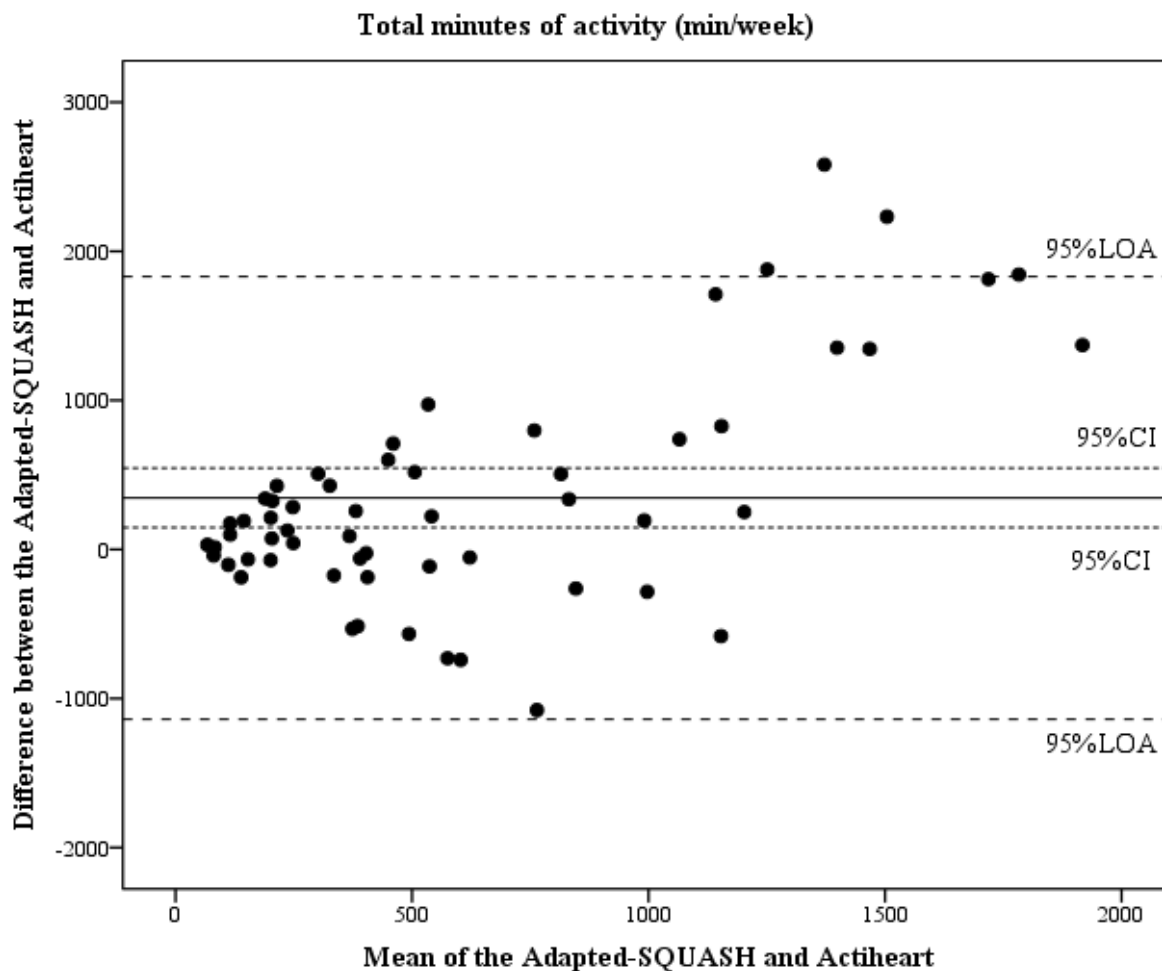

692

693 Fig 3. The differences between the total minutes of activity calculated with the Adapted-SQUASH and  
694 Actiheart, plotted against their mean for each participant, together with the 95% confidence interval (CI)  
695 and the 95% Limits of Agreement (LOA). (N=58).
